# Supplementary material for: A Precise Temperature-Responsive Bistable Switch Controlling Yersinia Virulence
Source: PLOS journal article supplement (doi:10.1371/journal.ppat.1006091), 2016-12-22
Supplement: S10 (10.1371/journal.ppat.1006091.s010) [file journal.ppat.1006091.s010]

**Table S3: Temperature-dependent DNA binding constants of RovA.**

| Site              | Temperature | Binding constant [nM]   |              | Hill coefficient | RSS          |
|-------------------|-------------|-------------------------|--------------|------------------|--------------|
| activating        | 25°C        | $k_a$                   | 6.01         | 2                | 0.053        |
| <b>activating</b> | <b>25°C</b> | <b><math>k_a</math></b> | <b>6.09</b>  | <b>3</b>         | <b>0.030</b> |
| activating        | 37°C        | $k_a$                   | 10.69        | 2                | 0.093        |
| <b>activating</b> | <b>25°C</b> | <b><math>k_a</math></b> | <b>10.23</b> | <b>3</b>         | <b>0.018</b> |
| <b>repressive</b> | <b>25°C</b> | <b><math>k_r</math></b> | <b>12.22</b> | <b>2</b>         | <b>0.048</b> |
| repressive        | 25°C        | $k_r$                   | 11.45        | 3                | 0.167        |
| <b>repressive</b> | <b>37°C</b> | <b><math>k_r</math></b> | <b>42.67</b> | <b>2</b>         | <b>0.045</b> |
| repressive        | 37°C        | $k_r$                   | 40.69        | 3                | 0.017        |

Calculated DNA binding constants for the activating and repressive RovA binding site at 25°C and 37°C with open and fixed Hill coefficients.
